# Supplementary material
Source: PubMed Central journal article supplement (PMC6825828)
Supplement: kwz173_fredman_web_material_final.pdf [file kwz173_fredman_web_material_final.pdf]

## WEB MATERIAL

### **Assessing the Role of Selection Bias in the Protective Relationship Between Caregiving and Mortality: the Caregiver-Study of Osteoporotic Fractures**

Meghan L. Smith, Timothy C. Heeren, Lysie R. Ranker, and Lisa Fredman

#### **Table of Contents:**

|                  |   |
|------------------|---|
| Web Table 1..... | 2 |
| Web Table 2..... | 3 |

**Web Table 1.** Characteristics (%) of caregivers and noncaregivers in a propensity-score-matched sample ( $n = 1,406$ ), Baltimore, Maryland; Minneapolis, Minnesota; Monongahela Valley, Pennsylvania; and Portland, Oregon; 1997–2009

|                                                 | <b>Caregiver<br/>(<math>n = 476</math>)</b> | <b>Noncaregiver<br/>(<math>n = 930</math>)</b> | <b>Standardized<br/>Difference</b> |
|-------------------------------------------------|---------------------------------------------|------------------------------------------------|------------------------------------|
| Site                                            |                                             |                                                |                                    |
| Baltimore                                       | 32.1                                        | 32.8                                           | -0.01                              |
| Minnesota                                       | 32.4                                        | 31.4                                           | 0.02                               |
| Pittsburgh                                      | 19.3                                        | 19.4                                           | 0.00                               |
| Portland                                        | 16.2                                        | 16.5                                           | -0.01                              |
| Age, years <sup>a</sup>                         | 81.3 (3.7)                                  | 81.3 (3.7)                                     | -0.03                              |
| White race                                      | 88.5                                        | 89.7                                           | -0.04                              |
| Education (>12 years)                           | 58.0                                        | 58.6                                           | -0.01                              |
| Married                                         | 56.1                                        | 54.7                                           | 0.03                               |
| Needing help with $\geq 1$ I/ADL                | 36.8                                        | 36.5                                           | 0.01                               |
| Functioning better than median <sup>a</sup>     |                                             |                                                |                                    |
| Chair stand time                                | 43.9                                        | 44.2                                           | -0.01                              |
| Usual walking speed                             | 60.5                                        | 62.4                                           | -0.04                              |
| Grip strength                                   | 56.3                                        | 55.3                                           | 0.02                               |
| Mental status                                   | 73.5                                        | 73.7                                           | 0.00                               |
| Usual walking speed $\geq 1$ m/sec <sup>b</sup> | 38.2                                        | 41.1                                           | -0.06                              |
| Parkinson disease                               | 0.8                                         | 0.5                                            | 0.04                               |
| Emphysema/chronic obstructive pulmonary disease | 10.5                                        | 9.6                                            | 0.03                               |
| Heart disease                                   | 9.0                                         | 8.7                                            | 0.01                               |

Abbreviations: ADL, activities of daily living; IADL, instrumental activities of daily living; SOF, Study of Osteoporotic Fractures.

<sup>a</sup> Values for age are expressed as mean (standard deviation).

<sup>b</sup> Participants who were unable to complete functional performance measures were considered to have below median functioning, walking speed < 1 m/sec.

**Web Table 2.** Relationship between caregiving status and mortality, and magnitude of association of a hypothetical confounder with caregiver status and death needed to make the association null (e-value), Baltimore, Maryland; Minneapolis, Minnesota; Monongahela Valley, Pennsylvania; and Portland, Oregon; 1997–2009

| <b>Caregiver-SOF Sample Construction</b> | <b>No. in Sample<sup>a</sup></b> | <b>Deaths<sup>b</sup>, %</b> | <b>aHR<sup>a</sup></b> | <b>95% CI</b> | <b>e-Value for aHR</b> |
|------------------------------------------|----------------------------------|------------------------------|------------------------|---------------|------------------------|
| Initially screened                       | 4,036                            | 36.6                         | 0.83                   | 0.73, 0.95    | 1.53                   |
| Recontacted subset                       | 3,368                            | 35.9                         | 0.84                   | 0.73, 0.96    | 1.51                   |
| Rescreened subset                        | 2,731                            | 42                           | 0.84                   | 0.74, 0.97    | 1.51                   |
| Eligible subset                          | 2,143                            | 42.9                         | 0.73                   | 0.62, 0.87    | 1.79                   |
| Invited subset                           | 1,449                            | 40.5                         | 0.74                   | 0.61, 0.89    | 1.77                   |
| Caregiver-SOF                            | 1,069                            | 38.6                         | 0.71                   | 0.57, 0.89    | 1.85                   |
|                                          |                                  |                              |                        |               |                        |
| <b>Alternative sample</b>                |                                  |                              |                        |               |                        |
| Propensity-score-matched sampled         | 1,406                            | 36.6                         | 0.77                   | 0.64, 0.93    | 1.69                   |

Abbreviations: aHR, adjusted hazard ratio; IADL, instrumental activities of daily living; SOF, Study of Osteoporotic Fractures.

<sup>a</sup> Between 0.6% and 1.2% of the samples were missing data on one or more covariates, and were thus excluded from the analysis.

<sup>b</sup> Adjusting for age at start of follow-up, race, education level, SOF site, IADL impairments, and physical and cognitive performance measures.

<sup>c</sup> For the initially screened, recontacted subset, and rescreened subset, modeling caregiving status at initial screening and death within 10 years of initial screening. for the eligible subset, invited subset, caregiver-SOF, and propensity-score-matched sample, modeling caregiving status at rescreening and death within 10 years of rescreening.

<sup>d</sup> No additional covariates are adjusted for in the fully adjusted model.
